# Supplementary material
Source: publisher figshare collection journal article supplement (https://acs.figshare.com/ndownloader/files/5192053)
Supplement: Supplementary file 1 [file 5192053]

# These structures are included in a paper submitted to the Journal of the American Chemical Society
# Title: Reduction of Dinitrogen to Planar Bimetallic M2(u-n2:n2-N2) Complexes
  of Y, Ho, Tm, and Lu using the K/Ln[N(SiMe3)2]3 Reduction System
# Authors: William J. Evans, David S. Lee, and Joseph W. Ziller 
# Contact author: William J. Evans, UC Irvine, Irvine, CA 92697-2025
# email: wevans@uci.edu
  
data_dl6 (213481)
  
_audit_creation_method            SHELXTL 
_chemical_name_systematic 
; 
 ? 
; 
_chemical_name_common             ? 
_chemical_melting_point           ? 
_chemical_formula_moiety          ? 
_chemical_formula_sum 
 'C32 H88 Lu2 N6 O2 Si8' 
_chemical_formula_weight          1163.74 
  
loop_ 
 _atom_type_symbol 
 _atom_type_description 
 _atom_type_scat_dispersion_real 
 _atom_type_scat_dispersion_imag 
 _atom_type_scat_source 
 'C'  'C'   0.0033   0.0016 
 'International Tables Vol C Tables 4.2.6.8 and 6.1.1.4' 
 'H'  'H'   0.0000   0.0000 
 'International Tables Vol C Tables 4.2.6.8 and 6.1.1.4' 
 'N'  'N'   0.0061   0.0033 
 'International Tables Vol C Tables 4.2.6.8 and 6.1.1.4' 
 'O'  'O'   0.0106   0.0060 
 'International Tables Vol C Tables 4.2.6.8 and 6.1.1.4' 
 'Si'  'Si'   0.0817   0.0704 
 'International Tables Vol C Tables 4.2.6.8 and 6.1.1.4' 
 'Lu'  'Lu'  -0.4720   5.8584 
 'International Tables Vol C Tables 4.2.6.8 and 6.1.1.4' 
  
_symmetry_cell_setting            Monoclinic 
_symmetry_space_group_name_H-M    P2(1)/n 
  
loop_ 
 _symmetry_equiv_pos_as_xyz 
 'x, y, z' 
 '-x+1/2, y+1/2, -z+1/2' 
 '-x, -y, -z' 
 'x-1/2, -y-1/2, z-1/2' 
  
_cell_length_a                    10.7686(4) 
_cell_length_b                    23.4769(9) 
_cell_length_c                    11.4898(4) 
_cell_angle_alpha                 90.00 
_cell_angle_beta                  112.7590(10) 
_cell_angle_gamma                 90.00 
_cell_volume                      2678.61(17) 
_cell_formula_units_Z             2 
_cell_measurement_temperature     173(2) 
_cell_measurement_reflns_used     ? 
_cell_measurement_theta_min       ? 
_cell_measurement_theta_max       ? 
  
_exptl_crystal_description        prism 
_exptl_crystal_colour             colorless 
_exptl_crystal_size_max           0.35 
_exptl_crystal_size_mid           0.33 
_exptl_crystal_size_min           0.22 
_exptl_crystal_density_meas       none 
_exptl_crystal_density_diffrn     1.443 
_exptl_crystal_density_method     'not measured' 
_exptl_crystal_F_000              1184 
_exptl_absorpt_coefficient_mu     3.874 
_exptl_absorpt_correction_type    multi-scan 
_exptl_absorpt_correction_T_min   0.3442 
_exptl_absorpt_correction_T_max   0.4828 
_exptl_absorpt_process_details    'Bruker SADABS' 
  
_exptl_special_details 
; 
 ? 
; 
  
_diffrn_ambient_temperature       173(2) 
_diffrn_radiation_wavelength      0.71073 
_diffrn_radiation_type            MoK\a 
_diffrn_radiation_source          'sealed tube' 
_diffrn_radiation_monochromator   graphite 
_diffrn_measurement_device_type   'CCD area detector' 
_diffrn_measurement_method        'omega scans' 
_diffrn_detector_area_resol_mean  ? 
_diffrn_standards_number          '50 frames' 
_diffrn_standards_interval_count  'initial 50 frames recollected' 
_diffrn_standards_interval_time   ? 
_diffrn_standards_decay_%         '< 1.0' 
_diffrn_reflns_number             27999 
_diffrn_reflns_av_R_equivalents   0.0253 
_diffrn_reflns_av_sigmaI/netI     0.0197 
_diffrn_reflns_limit_h_min        -14 
_diffrn_reflns_limit_h_max        14 
_diffrn_reflns_limit_k_min        -30 
_diffrn_reflns_limit_k_max        31 
_diffrn_reflns_limit_l_min        -15 
_diffrn_reflns_limit_l_max        15 
_diffrn_reflns_theta_min          2.11 
_diffrn_reflns_theta_max          28.31 
_reflns_number_total              6496 
_reflns_number_gt                 6042 
_reflns_threshold_expression      >2sigma(I) 
  
_computing_data_collection        'Bruker SMART' 
_computing_cell_refinement        'Bruker SMART/SAINT' 
_computing_data_reduction         'Bruker SAINT' 
_computing_structure_solution     'Bruker SHELXTL' 
_computing_structure_refinement   'Bruker SHELXTL' 
_computing_molecular_graphics     'Bruker SHELXTL' 
_computing_publication_material   'Bruker SHELXTL' 
  
_refine_special_details 
; 
 Refinement of F^2^ against ALL reflections.  The weighted R-factor wR and 
 goodness of fit S are based on F^2^, conventional R-factors R are based 
 on F, with F set to zero for negative F^2^. The threshold expression of 
 F^2^ > 2sigma(F^2^) is used only for calculating R-factors(gt) etc. and is 
 not relevant to the choice of reflections for refinement.  R-factors based 
 on F^2^ are statistically about twice as large as those based on F, and R- 
 factors based on ALL data will be even larger. 
; 
  
_refine_ls_structure_factor_coef  Fsqd 
_refine_ls_matrix_type            full 
_refine_ls_weighting_scheme       calc 
_refine_ls_weighting_details 
 'calc w=1/[\s^2^(Fo^2^)+(0.0130P)^2^+4.1455P] where P=(Fo^2^+2Fc^2^)/3' 
_atom_sites_solution_primary      direct 
_atom_sites_solution_secondary    difmap 
_atom_sites_solution_hydrogens    geom 
_refine_ls_hydrogen_treatment     constr 
_refine_ls_extinction_method      SHELXTL 
_refine_ls_extinction_coef        0.00063(6) 
_refine_ls_extinction_expression 
 'Fc^*^=kFc[1+0.001xFc^2^\l^3^/sin(2\q)]^-1/4^' 
_refine_ls_number_reflns          6496 
_refine_ls_number_parameters      227 
_refine_ls_number_restraints      0 
_refine_ls_R_factor_all           0.0235 
_refine_ls_R_factor_gt            0.0207 
_refine_ls_wR_factor_ref          0.0457 
_refine_ls_wR_factor_gt           0.0448 
_refine_ls_goodness_of_fit_ref    1.091 
_refine_ls_restrained_S_all       1.091 
_refine_ls_shift/su_max           0.002 
_refine_ls_shift/su_mean          0.000 
  
loop_ 
 _atom_site_label 
 _atom_site_type_symbol 
 _atom_site_fract_x 
 _atom_site_fract_y 
 _atom_site_fract_z 
 _atom_site_U_iso_or_equiv 
 _atom_site_adp_type 
 _atom_site_occupancy 
 _atom_site_symmetry_multiplicity 
 _atom_site_calc_flag 
 _atom_site_refinement_flags 
 _atom_site_disorder_assembly 
 _atom_site_disorder_group 
Lu1 Lu 0.449173(9) 0.086714(4) 0.527686(9) 0.01498(4) Uani 1 1 d . . . 
Si1 Si 0.51009(7) 0.17376(3) 0.32060(6) 0.01923(13) Uani 1 1 d . . . 
Si2 Si 0.24324(8) 0.11360(3) 0.22675(7) 0.02630(16) Uani 1 1 d . . . 
Si3 Si 0.26012(7) 0.16961(3) 0.63188(7) 0.02334(14) Uani 1 1 d . . . 
Si4 Si 0.25610(7) 0.04656(3) 0.69478(6) 0.01929(13) Uani 1 1 d . . . 
O1 O 0.63599(17) 0.10778(8) 0.70899(17) 0.0251(4) Uani 1 1 d . . . 
N1 N 0.3958(2) 0.12897(8) 0.34448(18) 0.0175(4) Uani 1 1 d . . . 
N2 N 0.3071(2) 0.10054(8) 0.62188(18) 0.0171(4) Uani 1 1 d . . . 
N3 N 0.4367(2) -0.00562(9) 0.4747(2) 0.0260(5) Uani 1 1 d . . . 
C1 C 0.5568(3) 0.15221(13) 0.1854(3) 0.0340(6) Uani 1 1 d . . . 
H1A H 0.5869 0.1125 0.1962 0.051 Uiso 1 1 calc R . . 
H1B H 0.6297 0.1767 0.1835 0.051 Uiso 1 1 calc R . . 
H1C H 0.4782 0.1562 0.1060 0.051 Uiso 1 1 calc R . . 
C2 C 0.4539(3) 0.25015(11) 0.2934(3) 0.0296(6) Uani 1 1 d . . . 
H2A H 0.4285 0.2631 0.3622 0.044 Uiso 1 1 calc R . . 
H2B H 0.3763 0.2534 0.2130 0.044 Uiso 1 1 calc R . . 
H2C H 0.5277 0.2738 0.2907 0.044 Uiso 1 1 calc R . . 
C3 C 0.6698(3) 0.17311(12) 0.4663(3) 0.0277(6) Uani 1 1 d . . . 
H3A H 0.6499 0.1842 0.5395 0.042 Uiso 1 1 calc R . . 
H3B H 0.7343 0.2000 0.4558 0.042 Uiso 1 1 calc R . . 
H3C H 0.7085 0.1347 0.4795 0.042 Uiso 1 1 calc R . . 
C4 C 0.1491(5) 0.1782(2) 0.1456(6) 0.126(3) Uani 1 1 d . . . 
H4A H 0.2042 0.2001 0.1108 0.188 Uiso 1 1 calc R . . 
H4B H 0.1283 0.2017 0.2061 0.188 Uiso 1 1 calc R . . 
H4C H 0.0651 0.1667 0.0770 0.188 Uiso 1 1 calc R . . 
C5 C 0.2606(5) 0.0664(3) 0.1039(4) 0.094(2) Uani 1 1 d . . . 
H5A H 0.3101 0.0319 0.1437 0.141 Uiso 1 1 calc R . . 
H5B H 0.3098 0.0866 0.0603 0.141 Uiso 1 1 calc R . . 
H5C H 0.1710 0.0559 0.0428 0.141 Uiso 1 1 calc R . . 
C6 C 0.1307(3) 0.07493(14) 0.2891(3) 0.0347(7) Uani 1 1 d . . . 
H6A H 0.1759 0.0403 0.3328 0.052 Uiso 1 1 calc R . . 
H6B H 0.0469 0.0646 0.2189 0.052 Uiso 1 1 calc R . . 
H6C H 0.1103 0.0995 0.3483 0.052 Uiso 1 1 calc R . . 
C7 C 0.0774(3) 0.18498(15) 0.5370(3) 0.0449(8) Uani 1 1 d . . . 
H7A H 0.0215 0.1605 0.5661 0.067 Uiso 1 1 calc R . . 
H7B H 0.0570 0.1775 0.4476 0.067 Uiso 1 1 calc R . . 
H7C H 0.0585 0.2250 0.5479 0.067 Uiso 1 1 calc R . . 
C8 C 0.3553(4) 0.21884(12) 0.5679(4) 0.0516(10) Uani 1 1 d . . . 
H8A H 0.4523 0.2130 0.6137 0.077 Uiso 1 1 calc R . . 
H8B H 0.3325 0.2584 0.5786 0.077 Uiso 1 1 calc R . . 
H8C H 0.3311 0.2109 0.4781 0.077 Uiso 1 1 calc R . . 
C9 C 0.3005(3) 0.19486(12) 0.7985(3) 0.0317(6) Uani 1 1 d . . . 
H9A H 0.2532 0.1709 0.8381 0.048 Uiso 1 1 calc R . . 
H9B H 0.2714 0.2345 0.7969 0.048 Uiso 1 1 calc R . . 
H9C H 0.3978 0.1923 0.8470 0.048 Uiso 1 1 calc R . . 
C10 C 0.3952(3) 0.02671(16) 0.8466(3) 0.0504(9) Uani 1 1 d . . . 
H10A H 0.4234 0.0604 0.9010 0.076 Uiso 1 1 calc R . . 
H10B H 0.4718 0.0121 0.8295 0.076 Uiso 1 1 calc R . . 
H10C H 0.3636 -0.0028 0.8890 0.076 Uiso 1 1 calc R . . 
C11 C 0.1056(3) 0.06414(15) 0.7320(4) 0.0432(8) Uani 1 1 d . . . 
H11A H 0.1238 0.0987 0.7837 0.065 Uiso 1 1 calc R . . 
H11B H 0.0871 0.0325 0.7785 0.065 Uiso 1 1 calc R . . 
H11C H 0.0273 0.0704 0.6533 0.065 Uiso 1 1 calc R . . 
C12 C 0.2080(4) -0.01934(13) 0.5966(3) 0.0477(9) Uani 1 1 d . . . 
H12A H 0.1348 -0.0106 0.5157 0.072 Uiso 1 1 calc R . . 
H12B H 0.1778 -0.0484 0.6410 0.072 Uiso 1 1 calc R . . 
H12C H 0.2860 -0.0336 0.5815 0.072 Uiso 1 1 calc R . . 
C13 C 0.6380(3) 0.13942(13) 0.8188(3) 0.0338(6) Uani 1 1 d . . . 
H13A H 0.5500 0.1368 0.8269 0.041 Uiso 1 1 calc R . . 
H13B H 0.6593 0.1801 0.8126 0.041 Uiso 1 1 calc R . . 
C14 C 0.7474(3) 0.11124(16) 0.9296(3) 0.0411(7) Uani 1 1 d . . . 
H14A H 0.7896 0.1388 0.9989 0.049 Uiso 1 1 calc R . . 
H14B H 0.7107 0.0790 0.9619 0.049 Uiso 1 1 calc R . . 
C15 C 0.8475(4) 0.09066(17) 0.8765(3) 0.0490(9) Uani 1 1 d . . . 
H15A H 0.9252 0.1170 0.9000 0.059 Uiso 1 1 calc R . . 
H15B H 0.8809 0.0522 0.9092 0.059 Uiso 1 1 calc R . . 
C16 C 0.7749(3) 0.08915(18) 0.7390(3) 0.0469(9) Uani 1 1 d . . . 
H16A H 0.8192 0.1147 0.6982 0.056 Uiso 1 1 calc R . . 
H16B H 0.7756 0.0500 0.7073 0.056 Uiso 1 1 calc R . . 
  
loop_ 
 _atom_site_aniso_label 
 _atom_site_aniso_U_11 
 _atom_site_aniso_U_22 
 _atom_site_aniso_U_33 
 _atom_site_aniso_U_23 
 _atom_site_aniso_U_13 
 _atom_site_aniso_U_12 
Lu1 0.01579(5) 0.01543(5) 0.01504(5) 0.00212(4) 0.00742(4) 0.00403(4) 
Si1 0.0213(3) 0.0167(3) 0.0207(3) 0.0029(2) 0.0093(3) -0.0008(3) 
Si2 0.0250(4) 0.0253(4) 0.0209(3) 0.0070(3) 0.0003(3) -0.0056(3) 
Si3 0.0292(4) 0.0195(3) 0.0249(3) -0.0008(3) 0.0144(3) 0.0073(3) 
Si4 0.0193(3) 0.0222(3) 0.0184(3) 0.0009(3) 0.0095(3) -0.0006(3) 
O1 0.0184(9) 0.0312(10) 0.0250(9) -0.0025(8) 0.0077(7) 0.0038(7) 
N1 0.0203(10) 0.0154(9) 0.0168(9) 0.0016(7) 0.0070(8) -0.0009(8) 
N2 0.0178(9) 0.0167(9) 0.0175(9) -0.0004(7) 0.0076(8) 0.0035(7) 
N3 0.0222(10) 0.0208(11) 0.0342(12) -0.0017(9) 0.0099(9) 0.0029(9) 
C1 0.0419(17) 0.0342(15) 0.0339(15) -0.0013(12) 0.0237(14) -0.0059(13) 
C2 0.0310(14) 0.0195(13) 0.0398(15) 0.0068(11) 0.0153(12) -0.0019(11) 
C3 0.0212(13) 0.0296(14) 0.0285(13) 0.0020(11) 0.0055(11) -0.0023(11) 
C4 0.053(3) 0.057(3) 0.171(6) 0.068(3) -0.062(3) -0.022(2) 
C5 0.068(3) 0.178(6) 0.050(2) -0.072(3) 0.038(2) -0.073(3) 
C6 0.0268(14) 0.0423(17) 0.0349(16) -0.0087(13) 0.0118(12) -0.0109(12) 
C7 0.0447(19) 0.0484(19) 0.0320(16) -0.0042(14) 0.0041(14) 0.0290(16) 
C8 0.091(3) 0.0154(13) 0.075(3) 0.0012(14) 0.062(2) 0.0023(16) 
C9 0.0310(14) 0.0307(14) 0.0332(15) -0.0119(12) 0.0123(12) 0.0031(12) 
C10 0.0407(19) 0.055(2) 0.0441(19) 0.0280(17) 0.0041(15) -0.0001(16) 
C11 0.0390(17) 0.0433(18) 0.063(2) -0.0056(16) 0.0365(17) -0.0085(14) 
C12 0.082(3) 0.0266(15) 0.052(2) -0.0114(14) 0.045(2) -0.0191(16) 
C13 0.0281(14) 0.0294(15) 0.0399(16) -0.0142(12) 0.0089(12) 0.0018(11) 
C14 0.0328(16) 0.056(2) 0.0286(15) -0.0119(14) 0.0053(13) -0.0011(14) 
C15 0.0381(18) 0.064(2) 0.0373(18) 0.0037(16) 0.0058(15) 0.0155(17) 
C16 0.0220(14) 0.080(3) 0.0328(16) -0.0003(16) 0.0039(12) 0.0225(16) 
  
_geom_special_details 
; 
 All esds (except the esd in the dihedral angle between two l.s. planes) 
 are estimated using the full covariance matrix.  The cell esds are taken 
 into account individually in the estimation of esds in distances, angles 
 and torsion angles; correlations between esds in cell parameters are only 
 used when they are defined by crystal symmetry.  An approximate (isotropic) 
 treatment of cell esds is used for estimating esds involving l.s. planes. 
; 
  
loop_ 
 _geom_bond_atom_site_label_1 
 _geom_bond_atom_site_label_2 
 _geom_bond_distance 
 _geom_bond_site_symmetry_2 
 _geom_bond_publ_flag 
Lu1 N1 2.1930(19) . ? 
Lu1 N2 2.2136(19) . ? 
Lu1 N3 2.241(2) . ? 
Lu1 N3 2.272(2) 3_656 ? 
Lu1 O1 2.3214(18) . ? 
Si1 N1 1.720(2) . ? 
Si1 C1 1.877(3) . ? 
Si1 C3 1.880(3) . ? 
Si1 C2 1.880(3) . ? 
Si2 N1 1.714(2) . ? 
Si2 C5 1.860(4) . ? 
Si2 C4 1.862(4) . ? 
Si2 C6 1.864(3) . ? 
Si3 N2 1.716(2) . ? 
Si3 C8 1.874(3) . ? 
Si3 C7 1.879(3) . ? 
Si3 C9 1.887(3) . ? 
Si4 N2 1.722(2) . ? 
Si4 C10 1.866(3) . ? 
Si4 C12 1.866(3) . ? 
Si4 C11 1.875(3) . ? 
O1 C13 1.457(3) . ? 
O1 C16 1.466(3) . ? 
N3 N3 1.285(4) 3_656 ? 
N3 Lu1 2.272(2) 3_656 ? 
C13 C14 1.512(4) . ? 
C14 C15 1.509(5) . ? 
C15 C16 1.467(4) . ? 
  
loop_ 
 _geom_angle_atom_site_label_1 
 _geom_angle_atom_site_label_2 
 _geom_angle_atom_site_label_3 
 _geom_angle 
 _geom_angle_site_symmetry_1 
 _geom_angle_site_symmetry_3 
 _geom_angle_publ_flag 
N1 Lu1 N2 115.40(7) . . ? 
N1 Lu1 N3 102.17(8) . . ? 
N2 Lu1 N3 107.13(8) . . ? 
N1 Lu1 N3 108.04(8) . 3_656 ? 
N2 Lu1 N3 127.46(8) . 3_656 ? 
N3 Lu1 N3 33.08(10) . 3_656 ? 
N1 Lu1 O1 125.40(7) . . ? 
N2 Lu1 O1 93.04(7) . . ? 
N3 Lu1 O1 112.94(7) . . ? 
N3 Lu1 O1 84.51(7) 3_656 . ? 
N1 Si1 C1 113.85(12) . . ? 
N1 Si1 C3 108.53(11) . . ? 
C1 Si1 C3 106.78(14) . . ? 
N1 Si1 C2 113.95(11) . . ? 
C1 Si1 C2 106.94(13) . . ? 
C3 Si1 C2 106.30(13) . . ? 
N1 Si1 Lu1 34.31(7) . . ? 
C1 Si1 Lu1 127.23(10) . . ? 
C3 Si1 Lu1 74.26(9) . . ? 
C2 Si1 Lu1 123.72(9) . . ? 
N1 Si2 C5 112.17(17) . . ? 
N1 Si2 C4 113.20(16) . . ? 
C5 Si2 C4 107.4(3) . . ? 
N1 Si2 C6 111.48(12) . . ? 
C5 Si2 C6 105.81(18) . . ? 
C4 Si2 C6 106.3(2) . . ? 
N1 Si2 Lu1 34.91(6) . . ? 
C5 Si2 Lu1 116.6(2) . . ? 
C4 Si2 Lu1 133.0(2) . . ? 
C6 Si2 Lu1 77.41(10) . . ? 
N2 Si3 C8 109.68(12) . . ? 
N2 Si3 C7 114.35(13) . . ? 
C8 Si3 C7 105.26(18) . . ? 
N2 Si3 C9 114.00(12) . . ? 
C8 Si3 C9 104.94(16) . . ? 
C7 Si3 C9 107.86(13) . . ? 
N2 Si3 Lu1 36.14(7) . . ? 
C8 Si3 Lu1 73.63(10) . . ? 
C7 Si3 Lu1 123.25(10) . . ? 
C9 Si3 Lu1 127.66(9) . . ? 
N2 Si4 C10 110.29(13) . . ? 
N2 Si4 C12 112.48(12) . . ? 
C10 Si4 C12 107.03(18) . . ? 
N2 Si4 C11 114.54(13) . . ? 
C10 Si4 C11 107.08(17) . . ? 
C12 Si4 C11 104.95(16) . . ? 
C13 O1 C16 106.0(2) . . ? 
C13 O1 Lu1 127.09(15) . . ? 
C16 O1 Lu1 126.79(17) . . ? 
Si2 N1 Si1 121.96(12) . . ? 
Si2 N1 Lu1 118.52(10) . . ? 
Si1 N1 Lu1 119.46(10) . . ? 
Si3 N2 Si4 120.36(11) . . ? 
Si3 N2 Lu1 116.66(10) . . ? 
Si4 N2 Lu1 122.74(10) . . ? 
N3 N3 Lu1 74.76(19) 3_656 . ? 
N3 N3 Lu1 72.16(18) 3_656 3_656 ? 
Lu1 N3 Lu1 146.92(10) . 3_656 ? 
O1 C13 C14 104.6(2) . . ? 
C15 C14 C13 104.2(3) . . ? 
C16 C15 C14 106.1(3) . . ? 
O1 C16 C15 108.4(3) . . ? 
  
_diffrn_measured_fraction_theta_max    0.972 
_diffrn_reflns_theta_full              28.31 
_diffrn_measured_fraction_theta_full   0.972 
_refine_diff_density_max    0.576 
_refine_diff_density_min   -0.837 
_refine_diff_density_rms    0.083 
  
#===end


data_dl7 (213482)
  
_audit_creation_method            SHELXTL 
_chemical_name_systematic 
; 
 ? 
; 
_chemical_name_common             ? 
_chemical_melting_point           ? 
_chemical_formula_moiety          ? 
_chemical_formula_sum 
 'C32 H88 N6 O2 Si8 Y2' 
_chemical_formula_weight          991.62 
  
loop_ 
 _atom_type_symbol 
 _atom_type_description 
 _atom_type_scat_dispersion_real 
 _atom_type_scat_dispersion_imag 
 _atom_type_scat_source 
 'C'  'C'   0.0033   0.0016 
 'International Tables Vol C Tables 4.2.6.8 and 6.1.1.4' 
 'H'  'H'   0.0000   0.0000 
 'International Tables Vol C Tables 4.2.6.8 and 6.1.1.4' 
 'N'  'N'   0.0061   0.0033 
 'International Tables Vol C Tables 4.2.6.8 and 6.1.1.4' 
 'O'  'O'   0.0106   0.0060 
 'International Tables Vol C Tables 4.2.6.8 and 6.1.1.4' 
 'Si'  'Si'   0.0817   0.0704 
 'International Tables Vol C Tables 4.2.6.8 and 6.1.1.4' 
 'Y'  'Y'  -2.7962   3.5667 
 'International Tables Vol C Tables 4.2.6.8 and 6.1.1.4' 
  
_symmetry_cell_setting            Monoclinic 
_symmetry_space_group_name_H-M    P2(1)/n 
  
loop_ 
 _symmetry_equiv_pos_as_xyz 
 'x, y, z' 
 '-x+1/2, y+1/2, -z+1/2' 
 '-x, -y, -z' 
 'x-1/2, -y-1/2, z-1/2' 
  
_cell_length_a                    10.8258(4) 
_cell_length_b                    23.5068(10) 
_cell_length_c                    11.5787(5) 
_cell_angle_alpha                 90.00 
_cell_angle_beta                  112.6830(10) 
_cell_angle_gamma                 90.00 
_cell_volume                      2718.64(19) 
_cell_formula_units_Z             2 
_cell_measurement_temperature     180(2) 
_cell_measurement_reflns_used     ? 
_cell_measurement_theta_min       ? 
_cell_measurement_theta_max       ? 
  
_exptl_crystal_description        cube 
_exptl_crystal_colour             colorless 
_exptl_crystal_size_max           0.31 
_exptl_crystal_size_mid           0.29 
_exptl_crystal_size_min           0.26 
_exptl_crystal_density_meas       none 
_exptl_crystal_density_diffrn     1.211 
_exptl_crystal_density_method     'not measured' 
_exptl_crystal_F_000              1056 
_exptl_absorpt_coefficient_mu     2.331 
_exptl_absorpt_correction_type    multi-scan 
_exptl_absorpt_correction_T_min   0.5319 
_exptl_absorpt_correction_T_max   0.5824 
_exptl_absorpt_process_details    'Bruker SADABS' 
  
_exptl_special_details 
; 
 ? 
; 
  
_diffrn_ambient_temperature       180(2) 
_diffrn_radiation_wavelength      0.71073 
_diffrn_radiation_type            MoK\a 
_diffrn_radiation_source          'sealed tube' 
_diffrn_radiation_monochromator   graphite 
_diffrn_measurement_device_type   'CCD area detector' 
_diffrn_measurement_method        'omega scans' 
_diffrn_detector_area_resol_mean  ? 
_diffrn_standards_number          '50 frames' 
_diffrn_standards_interval_count  'initial 50 frames recollected' 
_diffrn_standards_interval_time   ? 
_diffrn_standards_decay_%         '< 1.0' 
_diffrn_reflns_number             28313 
_diffrn_reflns_av_R_equivalents   0.0294 
_diffrn_reflns_av_sigmaI/netI     0.0256 
_diffrn_reflns_limit_h_min        -14 
_diffrn_reflns_limit_h_max        14 
_diffrn_reflns_limit_k_min        -31 
_diffrn_reflns_limit_k_max        31 
_diffrn_reflns_limit_l_min        -14 
_diffrn_reflns_limit_l_max        15 
_diffrn_reflns_theta_min          2.09 
_diffrn_reflns_theta_max          28.31 
_reflns_number_total              6571 
_reflns_number_gt                 5697 
_reflns_threshold_expression      >2sigma(I) 
  
_computing_data_collection        'Bruker SMART' 
_computing_cell_refinement        'Bruker SMART/SAINT' 
_computing_data_reduction         'Bruker SAINT' 
_computing_structure_solution     'Bruker SHELXTL' 
_computing_structure_refinement   'Bruker SHELXTL' 
_computing_molecular_graphics     'Bruker SHELXTL' 
_computing_publication_material   'Bruker SHELXTL' 
  
_refine_special_details 
; 
 Refinement of F^2^ against ALL reflections.  The weighted R-factor wR and 
 goodness of fit S are based on F^2^, conventional R-factors R are based 
 on F, with F set to zero for negative F^2^. The threshold expression of 
 F^2^ > 2sigma(F^2^) is used only for calculating R-factors(gt) etc. and is 
 not relevant to the choice of reflections for refinement.  R-factors based 
 on F^2^ are statistically about twice as large as those based on F, and R- 
 factors based on ALL data will be even larger. 
; 
  
_refine_ls_structure_factor_coef  Fsqd 
_refine_ls_matrix_type            full 
_refine_ls_weighting_scheme       calc 
_refine_ls_weighting_details 
 'calc w=1/[\s^2^(Fo^2^)+(0.0279P)^2^+1.9564P] where P=(Fo^2^+2Fc^2^)/3' 
_atom_sites_solution_primary      direct 
_atom_sites_solution_secondary    difmap 
_atom_sites_solution_hydrogens    geom 
_refine_ls_hydrogen_treatment     constr 
_refine_ls_extinction_method      none 
_refine_ls_extinction_coef        none 
_refine_ls_extinction_expression 
 'Fc^*^=kFc[1+0.001xFc^2^\l^3^/sin(2\q)]^-1/4^' 
_refine_ls_number_reflns          6571 
_refine_ls_number_parameters      227 
_refine_ls_number_restraints      0 
_refine_ls_R_factor_all           0.0372 
_refine_ls_R_factor_gt            0.0286 
_refine_ls_wR_factor_ref          0.0689 
_refine_ls_wR_factor_gt           0.0654 
_refine_ls_goodness_of_fit_ref    1.042 
_refine_ls_restrained_S_all       1.042 
_refine_ls_shift/su_max           0.031 
_refine_ls_shift/su_mean          0.000 
  
loop_ 
 _atom_site_label 
 _atom_site_type_symbol 
 _atom_site_fract_x 
 _atom_site_fract_y 
 _atom_site_fract_z 
 _atom_site_U_iso_or_equiv 
 _atom_site_adp_type 
 _atom_site_occupancy 
 _atom_site_symmetry_multiplicity 
 _atom_site_calc_flag 
 _atom_site_refinement_flags 
 _atom_site_disorder_assembly 
 _atom_site_disorder_group 
Y1 Y 0.446112(17) 0.088730(7) 0.526084(15) 0.01820(6) Uani 1 1 d . . . 
Si1 Si 0.50699(5) 0.17408(2) 0.31667(5) 0.02274(12) Uani 1 1 d . . . 
Si2 Si 0.23966(6) 0.11432(3) 0.22283(5) 0.02812(13) Uani 1 1 d . . . 
Si3 Si 0.25780(6) 0.16954(2) 0.63383(5) 0.02552(12) Uani 1 1 d . . . 
Si4 Si 0.25284(5) 0.04616(2) 0.69586(5) 0.02297(12) Uani 1 1 d . . . 
O1 O 0.63629(13) 0.10871(6) 0.71314(13) 0.0285(3) Uani 1 1 d . . . 
N1 N 0.39145(15) 0.12992(7) 0.33799(14) 0.0208(3) Uani 1 1 d . . . 
N2 N 0.30346(15) 0.10050(6) 0.62470(14) 0.0197(3) Uani 1 1 d . . . 
N3 N 0.43817(16) -0.00596(7) 0.47515(16) 0.0261(3) Uani 1 1 d . . . 
C1 C 0.5565(2) 0.15242(10) 0.1844(2) 0.0376(5) Uani 1 1 d . . . 
H1A H 0.5858 0.1126 0.1954 0.056 Uiso 1 1 calc R . . 
H1B H 0.6300 0.1767 0.1841 0.056 Uiso 1 1 calc R . . 
H1C H 0.4796 0.1567 0.1048 0.056 Uiso 1 1 calc R . . 
C2 C 0.4520(2) 0.25049(9) 0.2904(2) 0.0334(5) Uani 1 1 d . . . 
H2A H 0.4254 0.2632 0.3580 0.050 Uiso 1 1 calc R . . 
H2B H 0.3758 0.2540 0.2101 0.050 Uiso 1 1 calc R . . 
H2C H 0.5262 0.2741 0.2893 0.050 Uiso 1 1 calc R . . 
C3 C 0.6632(2) 0.17216(9) 0.4633(2) 0.0315(4) Uani 1 1 d . . . 
H3A H 0.6417 0.1833 0.5350 0.047 Uiso 1 1 calc R . . 
H3B H 0.7293 0.1986 0.4551 0.047 Uiso 1 1 calc R . . 
H3C H 0.7002 0.1335 0.4764 0.047 Uiso 1 1 calc R . . 
C4 C 0.1434(3) 0.17911(14) 0.1457(4) 0.1127(19) Uani 1 1 d . . . 
H4A H 0.1959 0.2015 0.1094 0.169 Uiso 1 1 calc R . . 
H4B H 0.1251 0.2022 0.2078 0.169 Uiso 1 1 calc R . . 
H4C H 0.0586 0.1677 0.0793 0.169 Uiso 1 1 calc R . . 
C5 C 0.2552(3) 0.0678(2) 0.0987(3) 0.0867(14) Uani 1 1 d . . . 
H5A H 0.3112 0.0868 0.0609 0.130 Uiso 1 1 calc R . . 
H5B H 0.1662 0.0607 0.0341 0.130 Uiso 1 1 calc R . . 
H5C H 0.2965 0.0316 0.1357 0.130 Uiso 1 1 calc R . . 
C6 C 0.1316(2) 0.07477(11) 0.2882(2) 0.0399(5) Uani 1 1 d . . . 
H6A H 0.1780 0.0402 0.3302 0.060 Uiso 1 1 calc R . . 
H6B H 0.0472 0.0644 0.2201 0.060 Uiso 1 1 calc R . . 
H6C H 0.1130 0.0989 0.3485 0.060 Uiso 1 1 calc R . . 
C7 C 0.0768(2) 0.18558(11) 0.5394(2) 0.0465(6) Uani 1 1 d . . . 
H7A H 0.0532 0.1724 0.4532 0.070 Uiso 1 1 calc R . . 
H7B H 0.0619 0.2267 0.5394 0.070 Uiso 1 1 calc R . . 
H7C H 0.0209 0.1660 0.5763 0.070 Uiso 1 1 calc R . . 
C8 C 0.3554(3) 0.21731(10) 0.5691(3) 0.0497(7) Uani 1 1 d . . . 
H8A H 0.4515 0.2108 0.6148 0.075 Uiso 1 1 calc R . . 
H8B H 0.3342 0.2571 0.5786 0.075 Uiso 1 1 calc R . . 
H8C H 0.3313 0.2088 0.4802 0.075 Uiso 1 1 calc R . . 
C9 C 0.2985(2) 0.19571(10) 0.7984(2) 0.0348(5) Uani 1 1 d . . . 
H9A H 0.3928 0.1880 0.8496 0.052 Uiso 1 1 calc R . . 
H9B H 0.2417 0.1760 0.8342 0.052 Uiso 1 1 calc R . . 
H9C H 0.2821 0.2368 0.7969 0.052 Uiso 1 1 calc R . . 
C10 C 0.3922(3) 0.02542(12) 0.8455(2) 0.0500(7) Uani 1 1 d . . . 
H10A H 0.4203 0.0586 0.9008 0.075 Uiso 1 1 calc R . . 
H10B H 0.4682 0.0114 0.8274 0.075 Uiso 1 1 calc R . . 
H10C H 0.3613 -0.0046 0.8867 0.075 Uiso 1 1 calc R . . 
C11 C 0.1029(2) 0.06347(11) 0.7338(2) 0.0405(6) Uani 1 1 d . . . 
H11A H 0.0277 0.0743 0.6570 0.061 Uiso 1 1 calc R . . 
H11B H 0.1247 0.0951 0.7935 0.061 Uiso 1 1 calc R . . 
H11C H 0.0783 0.0300 0.7708 0.061 Uiso 1 1 calc R . . 
C12 C 0.2043(3) -0.01909(10) 0.5954(2) 0.0464(6) Uani 1 1 d . . . 
H12A H 0.1310 -0.0099 0.5159 0.070 Uiso 1 1 calc R . . 
H12B H 0.1750 -0.0488 0.6387 0.070 Uiso 1 1 calc R . . 
H12C H 0.2815 -0.0328 0.5790 0.070 Uiso 1 1 calc R . . 
C13 C 0.6372(2) 0.13876(10) 0.8232(2) 0.0378(5) Uani 1 1 d . . . 
H13A H 0.5495 0.1352 0.8309 0.045 Uiso 1 1 calc R . . 
H13B H 0.6575 0.1796 0.8191 0.045 Uiso 1 1 calc R . . 
C14 C 0.7464(2) 0.11000(12) 0.9319(2) 0.0462(6) Uani 1 1 d . . . 
H14A H 0.7885 0.1371 1.0015 0.055 Uiso 1 1 calc R . . 
H14B H 0.7102 0.0774 0.9630 0.055 Uiso 1 1 calc R . . 
C15 C 0.8454(3) 0.09029(14) 0.8780(2) 0.0542(7) Uani 1 1 d . . . 
H15A H 0.9237 0.1161 0.9040 0.065 Uiso 1 1 calc R . . 
H15B H 0.8770 0.0514 0.9073 0.065 Uiso 1 1 calc R . . 
C16 C 0.7744(2) 0.09110(13) 0.7409(2) 0.0479(7) Uani 1 1 d . . . 
H16A H 0.8182 0.1181 0.7031 0.057 Uiso 1 1 calc R . . 
H16B H 0.7760 0.0528 0.7060 0.057 Uiso 1 1 calc R . . 
  
loop_ 
 _atom_site_aniso_label 
 _atom_site_aniso_U_11 
 _atom_site_aniso_U_22 
 _atom_site_aniso_U_33 
 _atom_site_aniso_U_23 
 _atom_site_aniso_U_13 
 _atom_site_aniso_U_12 
Y1 0.01865(9) 0.01994(9) 0.01760(9) 0.00182(6) 0.00872(6) 0.00365(7) 
Si1 0.0257(3) 0.0207(3) 0.0235(3) 0.0033(2) 0.0113(2) -0.0004(2) 
Si2 0.0269(3) 0.0284(3) 0.0230(3) 0.0059(2) 0.0029(2) -0.0028(2) 
Si3 0.0299(3) 0.0235(3) 0.0262(3) -0.0018(2) 0.0142(2) 0.0064(2) 
Si4 0.0233(3) 0.0267(3) 0.0220(3) 0.0006(2) 0.0120(2) -0.0005(2) 
O1 0.0209(7) 0.0356(8) 0.0276(7) -0.0034(6) 0.0077(6) 0.0032(6) 
N1 0.0235(8) 0.0188(8) 0.0198(7) 0.0020(6) 0.0078(6) -0.0003(6) 
N2 0.0200(8) 0.0211(8) 0.0194(7) -0.0005(6) 0.0091(6) 0.0023(6) 
N3 0.0240(8) 0.0247(8) 0.0309(9) -0.0003(7) 0.0120(7) 0.0019(7) 
C1 0.0449(13) 0.0392(13) 0.0371(12) -0.0007(10) 0.0251(10) -0.0064(11) 
C2 0.0366(12) 0.0241(10) 0.0421(12) 0.0077(9) 0.0182(10) -0.0002(9) 
C3 0.0271(10) 0.0322(11) 0.0333(11) 0.0004(9) 0.0097(9) -0.0026(9) 
C4 0.0518(19) 0.056(2) 0.152(4) 0.055(2) -0.047(2) -0.0148(16) 
C5 0.063(2) 0.159(4) 0.0482(17) -0.060(2) 0.0325(16) -0.055(2) 
C6 0.0339(12) 0.0475(14) 0.0390(13) -0.0104(10) 0.0147(10) -0.0125(11) 
C7 0.0455(14) 0.0503(15) 0.0355(13) -0.0031(11) 0.0066(11) 0.0263(12) 
C8 0.082(2) 0.0224(11) 0.0657(17) -0.0010(11) 0.0523(16) 0.0000(12) 
C9 0.0340(12) 0.0364(12) 0.0350(11) -0.0122(9) 0.0144(9) 0.0042(9) 
C10 0.0418(14) 0.0575(17) 0.0439(14) 0.0240(12) 0.0090(11) 0.0021(12) 
C11 0.0359(12) 0.0452(14) 0.0528(14) -0.0084(11) 0.0309(11) -0.0080(11) 
C12 0.0714(18) 0.0319(12) 0.0521(15) -0.0083(11) 0.0415(14) -0.0165(12) 
C13 0.0322(12) 0.0388(13) 0.0399(12) -0.0154(10) 0.0112(10) -0.0002(10) 
C14 0.0397(14) 0.0613(17) 0.0305(12) -0.0113(11) 0.0058(10) -0.0029(12) 
C15 0.0400(14) 0.073(2) 0.0408(14) 0.0067(13) 0.0061(11) 0.0153(13) 
C16 0.0255(12) 0.0747(19) 0.0382(13) -0.0035(12) 0.0066(10) 0.0174(12) 
  
_geom_special_details 
; 
 All esds (except the esd in the dihedral angle between two l.s. planes) 
 are estimated using the full covariance matrix.  The cell esds are taken 
 into account individually in the estimation of esds in distances, angles 
 and torsion angles; correlations between esds in cell parameters are only 
 used when they are defined by crystal symmetry.  An approximate (isotropic) 
 treatment of cell esds is used for estimating esds involving l.s. planes. 
; 
  
loop_ 
 _geom_bond_atom_site_label_1 
 _geom_bond_atom_site_label_2 
 _geom_bond_distance 
 _geom_bond_site_symmetry_2 
 _geom_bond_publ_flag 
Y1 N1 2.2443(15) . ? 
Y1 N2 2.2640(15) . ? 
Y1 N3 2.2958(17) . ? 
Y1 N3 2.3170(16) 3_656 ? 
Y1 O1 2.3898(14) . ? 
Si1 N1 1.7150(16) . ? 
Si1 C1 1.877(2) . ? 
Si1 C3 1.879(2) . ? 
Si1 C2 1.880(2) . ? 
Si2 N1 1.7096(16) . ? 
Si2 C5 1.864(3) . ? 
Si2 C6 1.867(2) . ? 
Si2 C4 1.867(3) . ? 
Si3 N2 1.7114(16) . ? 
Si3 C7 1.878(2) . ? 
Si3 C8 1.884(2) . ? 
Si3 C9 1.886(2) . ? 
Si4 N2 1.7202(16) . ? 
Si4 C10 1.871(2) . ? 
Si4 C12 1.874(2) . ? 
Si4 C11 1.882(2) . ? 
O1 C13 1.453(3) . ? 
O1 C16 1.463(3) . ? 
N3 N3 1.268(3) 3_656 ? 
N3 Y1 2.3170(16) 3_656 ? 
C13 C14 1.514(3) . ? 
C14 C15 1.506(4) . ? 
C15 C16 1.473(3) . ? 
  
loop_ 
 _geom_angle_atom_site_label_1 
 _geom_angle_atom_site_label_2 
 _geom_angle_atom_site_label_3 
 _geom_angle 
 _geom_angle_site_symmetry_1 
 _geom_angle_site_symmetry_3 
 _geom_angle_publ_flag 
N1 Y1 N2 117.44(6) . . ? 
N1 Y1 N3 101.49(6) . . ? 
N2 Y1 N3 106.43(6) . . ? 
N1 Y1 N3 107.28(6) . 3_656 ? 
N2 Y1 N3 125.54(6) . 3_656 ? 
N3 Y1 N3 31.90(8) . 3_656 ? 
N1 Y1 O1 127.39(5) . . ? 
N2 Y1 O1 92.05(5) . . ? 
N3 Y1 O1 110.93(5) . . ? 
N3 Y1 O1 83.79(5) 3_656 . ? 
N1 Si1 C1 114.01(9) . . ? 
N1 Si1 C3 107.93(9) . . ? 
C1 Si1 C3 106.85(11) . . ? 
N1 Si1 C2 113.50(9) . . ? 
C1 Si1 C2 107.41(10) . . ? 
C3 Si1 C2 106.72(10) . . ? 
N1 Si1 Y1 35.70(5) . . ? 
C1 Si1 Y1 128.04(8) . . ? 
C3 Si1 Y1 72.31(7) . . ? 
C2 Si1 Y1 122.87(7) . . ? 
N1 Si2 C5 112.44(12) . . ? 
N1 Si2 C6 110.77(9) . . ? 
C5 Si2 C6 106.12(14) . . ? 
N1 Si2 C4 112.92(12) . . ? 
C5 Si2 C4 108.0(2) . . ? 
C6 Si2 C4 106.19(16) . . ? 
N1 Si2 Y1 35.29(5) . . ? 
C5 Si2 Y1 118.19(14) . . ? 
C6 Si2 Y1 76.07(8) . . ? 
C4 Si2 Y1 131.28(15) . . ? 
N2 Si3 C7 114.58(10) . . ? 
N2 Si3 C8 108.72(9) . . ? 
C7 Si3 C8 105.55(13) . . ? 
N2 Si3 C9 114.28(9) . . ? 
C7 Si3 C9 107.90(10) . . ? 
C8 Si3 C9 105.03(12) . . ? 
N2 Si3 Y1 37.79(5) . . ? 
C7 Si3 Y1 122.96(8) . . ? 
C8 Si3 Y1 71.06(7) . . ? 
C9 Si3 Y1 128.40(7) . . ? 
N2 Si4 C10 110.17(10) . . ? 
N2 Si4 C12 112.06(9) . . ? 
C10 Si4 C12 107.13(13) . . ? 
N2 Si4 C11 114.45(10) . . ? 
C10 Si4 C11 107.48(12) . . ? 
C12 Si4 C11 105.14(12) . . ? 
C13 O1 C16 106.51(16) . . ? 
C13 O1 Y1 127.01(12) . . ? 
C16 O1 Y1 126.44(13) . . ? 
Si2 N1 Si1 123.55(9) . . ? 
Si2 N1 Y1 118.60(8) . . ? 
Si1 N1 Y1 117.83(8) . . ? 
Si3 N2 Si4 121.44(9) . . ? 
Si3 N2 Y1 114.61(8) . . ? 
Si4 N2 Y1 123.78(8) . . ? 
N3 N3 Y1 74.97(14) 3_656 . ? 
N3 N3 Y1 73.13(14) 3_656 3_656 ? 
Y1 N3 Y1 148.10(8) . 3_656 ? 
O1 C13 C14 104.53(18) . . ? 
C15 C14 C13 104.2(2) . . ? 
C16 C15 C14 106.5(2) . . ? 
O1 C16 C15 107.8(2) . . ? 
  
_diffrn_measured_fraction_theta_max    0.970 
_diffrn_reflns_theta_full              28.31 
_diffrn_measured_fraction_theta_full   0.970 
_refine_diff_density_max    0.530 
_refine_diff_density_min   -0.314 
_refine_diff_density_rms    0.059 
  
#===end

  
data_dl11 (213483)
  
_audit_creation_method            SHELXTL 
_chemical_name_systematic 
; 
 ? 
; 
_chemical_name_common             ? 
_chemical_melting_point           ? 
_chemical_formula_moiety          ? 
_chemical_formula_sum 
 'C32 H88 Ho2 N6 O2 Si8' 
_chemical_formula_weight          1143.66 
  
loop_ 
 _atom_type_symbol 
 _atom_type_description 
 _atom_type_scat_dispersion_real 
 _atom_type_scat_dispersion_imag 
 _atom_type_scat_source 
 'C'  'C'   0.0033   0.0016 
 'International Tables Vol C Tables 4.2.6.8 and 6.1.1.4' 
 'H'  'H'   0.0000   0.0000 
 'International Tables Vol C Tables 4.2.6.8 and 6.1.1.4' 
 'N'  'N'   0.0061   0.0033 
 'International Tables Vol C Tables 4.2.6.8 and 6.1.1.4' 
 'O'  'O'   0.0106   0.0060 
 'International Tables Vol C Tables 4.2.6.8 and 6.1.1.4' 
 'Si'  'Si'   0.0817   0.0704 
 'International Tables Vol C Tables 4.2.6.8 and 6.1.1.4' 
 'Ho'  'Ho'  -0.2175   4.6783 
 'International Tables Vol C Tables 4.2.6.8 and 6.1.1.4' 
  
_symmetry_cell_setting            Monoclinic 
_symmetry_space_group_name_H-M    P2(1)/n 
  
loop_ 
 _symmetry_equiv_pos_as_xyz 
 'x, y, z' 
 '-x+1/2, y+1/2, -z+1/2' 
 '-x, -y, -z' 
 'x-1/2, -y-1/2, z-1/2' 
  
_cell_length_a                    10.8135(4) 
_cell_length_b                    23.4721(9) 
_cell_length_c                    11.5460(4) 
_cell_angle_alpha                 90.00 
_cell_angle_beta                  112.5870(10) 
_cell_angle_gamma                 90.00 
_cell_volume                      2705.77(17) 
_cell_formula_units_Z             2 
_cell_measurement_temperature     172(2) 
_cell_measurement_reflns_used     ? 
_cell_measurement_theta_min       ? 
_cell_measurement_theta_max       ? 
  
_exptl_crystal_description        cube 
_exptl_crystal_colour             'pale yellow' 
_exptl_crystal_size_max           0.19 
_exptl_crystal_size_mid           0.19 
_exptl_crystal_size_min           0.16 
_exptl_crystal_density_meas       none 
_exptl_crystal_density_diffrn     1.404 
_exptl_crystal_density_method     'not measured' 
_exptl_crystal_F_000              1168 
_exptl_absorpt_coefficient_mu     3.111 
_exptl_absorpt_correction_type    multi-scan 
_exptl_absorpt_correction_T_min   0.5894 
_exptl_absorpt_correction_T_max   0.6359 
_exptl_absorpt_process_details    'Bruker SADABS' 
  
_exptl_special_details 
; 
 ? 
; 
  
_diffrn_ambient_temperature       172(2) 
_diffrn_radiation_wavelength      0.71073 
_diffrn_radiation_type            MoK\a 
_diffrn_radiation_source          'sealed tube' 
_diffrn_radiation_monochromator   graphite 
_diffrn_measurement_device_type   'CCD area detector' 
_diffrn_measurement_method        'omega scans' 
_diffrn_detector_area_resol_mean  ? 
_diffrn_standards_number          '50 frames' 
_diffrn_standards_interval_count  'initial 50 frames recollected' 
_diffrn_standards_interval_time   ? 
_diffrn_standards_decay_%         '< 1.0' 
_diffrn_reflns_number             28475 
_diffrn_reflns_av_R_equivalents   0.0329 
_diffrn_reflns_av_sigmaI/netI     0.0261 
_diffrn_reflns_limit_h_min        -14 
_diffrn_reflns_limit_h_max        13 
_diffrn_reflns_limit_k_min        -30 
_diffrn_reflns_limit_k_max        30 
_diffrn_reflns_limit_l_min        -15 
_diffrn_reflns_limit_l_max        15 
_diffrn_reflns_theta_min          2.10 
_diffrn_reflns_theta_max          28.29 
_reflns_number_total              6527 
_reflns_number_gt                 5671 
_reflns_threshold_expression      >2sigma(I) 
  
_computing_data_collection        'Bruker SMART' 
_computing_cell_refinement        'Bruker SMART/SAINT' 
_computing_data_reduction         'Bruker SAINT' 
_computing_structure_solution     'Bruker SHELXTL' 
_computing_structure_refinement   'Bruker SHELXTL' 
_computing_molecular_graphics     'Bruker SHELXTL' 
_computing_publication_material   'Bruker SHELXTL' 
  
_refine_special_details 
; 
 Refinement of F^2^ against ALL reflections.  The weighted R-factor wR and 
 goodness of fit S are based on F^2^, conventional R-factors R are based 
 on F, with F set to zero for negative F^2^. The threshold expression of 
 F^2^ > 2sigma(F^2^) is used only for calculating R-factors(gt) etc. and is 
 not relevant to the choice of reflections for refinement.  R-factors based 
 on F^2^ are statistically about twice as large as those based on F, and R- 
 factors based on ALL data will be even larger. 
; 
  
_refine_ls_structure_factor_coef  Fsqd 
_refine_ls_matrix_type            full 
_refine_ls_weighting_scheme       calc 
_refine_ls_weighting_details 
 'calc w=1/[\s^2^(Fo^2^)+(0.0164P)^2^+3.0650P] where P=(Fo^2^+2Fc^2^)/3' 
_atom_sites_solution_primary      direct 
_atom_sites_solution_secondary    difmap 
_atom_sites_solution_hydrogens    geom 
_refine_ls_hydrogen_treatment     constr 
_refine_ls_extinction_method      none 
_refine_ls_extinction_coef        ? 
_refine_ls_number_reflns          6527 
_refine_ls_number_parameters      226 
_refine_ls_number_restraints      0 
_refine_ls_R_factor_all           0.0296 
_refine_ls_R_factor_gt            0.0223 
_refine_ls_wR_factor_ref          0.0501 
_refine_ls_wR_factor_gt           0.0473 
_refine_ls_goodness_of_fit_ref    1.048 
_refine_ls_restrained_S_all       1.048 
_refine_ls_shift/su_max           0.001 
_refine_ls_shift/su_mean          0.000 
  
loop_ 
 _atom_site_label 
 _atom_site_type_symbol 
 _atom_site_fract_x 
 _atom_site_fract_y 
 _atom_site_fract_z 
 _atom_site_U_iso_or_equiv 
 _atom_site_adp_type 
 _atom_site_occupancy 
 _atom_site_symmetry_multiplicity 
 _atom_site_calc_flag 
 _atom_site_refinement_flags 
 _atom_site_disorder_assembly 
 _atom_site_disorder_group 
Ho1 Ho 0.447185(10) 0.088927(5) 0.527043(10) 0.01767(4) Uani 1 1 d . . . 
Si1 Si 0.50720(7) 0.17409(3) 0.31762(7) 0.02211(14) Uani 1 1 d . . . 
Si2 Si 0.23970(7) 0.11428(3) 0.22325(7) 0.02767(16) Uani 1 1 d . . . 
Si3 Si 0.25807(7) 0.16974(3) 0.63412(7) 0.02533(15) Uani 1 1 d . . . 
Si4 Si 0.25287(7) 0.04606(3) 0.69540(7) 0.02233(14) Uani 1 1 d . . . 
O1 O 0.63747(17) 0.10824(8) 0.71442(17) 0.0280(4) Uani 1 1 d . . . 
N1 N 0.3915(2) 0.13001(9) 0.33896(18) 0.0202(4) Uani 1 1 d . . . 
N2 N 0.3035(2) 0.10065(8) 0.62374(19) 0.0200(4) Uani 1 1 d . . . 
N3 N 0.4383(2) -0.00582(9) 0.4749(2) 0.0228(4) Uani 1 1 d . . . 
C1 C 0.5572(3) 0.15216(13) 0.1855(3) 0.0374(7) Uani 1 1 d . . . 
H1A H 0.5865 0.1123 0.1968 0.056 Uiso 1 1 calc R . . 
H1B H 0.6309 0.1764 0.1851 0.056 Uiso 1 1 calc R . . 
H1C H 0.4805 0.1563 0.1057 0.056 Uiso 1 1 calc R . . 
C2 C 0.4527(3) 0.25052(11) 0.2910(3) 0.0319(6) Uani 1 1 d . . . 
H2A H 0.4258 0.2633 0.3586 0.048 Uiso 1 1 calc R . . 
H2B H 0.3767 0.2541 0.2104 0.048 Uiso 1 1 calc R . . 
H2C H 0.5271 0.2741 0.2899 0.048 Uiso 1 1 calc R . . 
C3 C 0.6631(3) 0.17185(12) 0.4646(3) 0.0309(6) Uani 1 1 d . . . 
H3A H 0.6950 0.1325 0.4817 0.046 Uiso 1 1 calc R . . 
H3B H 0.6431 0.1864 0.5351 0.046 Uiso 1 1 calc R . . 
H3C H 0.7324 0.1955 0.4536 0.046 Uiso 1 1 calc R . . 
C4 C 0.1451(4) 0.17901(18) 0.1447(5) 0.115(3) Uani 1 1 d . . . 
H4A H 0.1987 0.2011 0.1088 0.173 Uiso 1 1 calc R . . 
H4B H 0.1261 0.2024 0.2062 0.173 Uiso 1 1 calc R . . 
H4C H 0.0607 0.1676 0.0777 0.173 Uiso 1 1 calc R . . 
C5 C 0.2561(4) 0.0673(2) 0.1001(4) 0.0844(17) Uani 1 1 d . . . 
H5A H 0.3127 0.0860 0.0624 0.127 Uiso 1 1 calc R . . 
H5B H 0.1673 0.0601 0.0352 0.127 Uiso 1 1 calc R . . 
H5C H 0.2971 0.0311 0.1379 0.127 Uiso 1 1 calc R . . 
C6 C 0.1311(3) 0.07515(14) 0.2882(3) 0.0391(7) Uani 1 1 d . . . 
H6A H 0.1770 0.0405 0.3304 0.059 Uiso 1 1 calc R . . 
H6B H 0.0467 0.0649 0.2198 0.059 Uiso 1 1 calc R . . 
H6C H 0.1124 0.0995 0.3485 0.059 Uiso 1 1 calc R . . 
C7 C 0.0773(3) 0.18596(15) 0.5393(3) 0.0459(8) Uani 1 1 d . . . 
H7A H 0.0205 0.1623 0.5687 0.069 Uiso 1 1 calc R . . 
H7B H 0.0572 0.1778 0.4506 0.069 Uiso 1 1 calc R . . 
H7C H 0.0597 0.2263 0.5490 0.069 Uiso 1 1 calc R . . 
C8 C 0.3555(4) 0.21753(13) 0.5698(4) 0.0496(9) Uani 1 1 d . . . 
H8A H 0.4516 0.2110 0.6156 0.074 Uiso 1 1 calc R . . 
H8B H 0.3343 0.2574 0.5796 0.074 Uiso 1 1 calc R . . 
H8C H 0.3315 0.2092 0.4807 0.074 Uiso 1 1 calc R . . 
C9 C 0.2987(3) 0.19550(13) 0.7992(3) 0.0340(6) Uani 1 1 d . . . 
H9A H 0.2504 0.1723 0.8387 0.051 Uiso 1 1 calc R . . 
H9B H 0.2716 0.2354 0.7974 0.051 Uiso 1 1 calc R . . 
H9C H 0.3953 0.1922 0.8475 0.051 Uiso 1 1 calc R . . 
C10 C 0.3923(3) 0.02550(16) 0.8452(3) 0.0485(9) Uani 1 1 d . . . 
H10A H 0.4202 0.0588 0.9004 0.073 Uiso 1 1 calc R . . 
H10B H 0.4682 0.0114 0.8271 0.073 Uiso 1 1 calc R . . 
H10C H 0.3614 -0.0045 0.8867 0.073 Uiso 1 1 calc R . . 
C11 C 0.1034(3) 0.06351(14) 0.7338(3) 0.0394(7) Uani 1 1 d . . . 
H11A H 0.0280 0.0742 0.6568 0.059 Uiso 1 1 calc R . . 
H11B H 0.1253 0.0953 0.7932 0.059 Uiso 1 1 calc R . . 
H11C H 0.0789 0.0301 0.7713 0.059 Uiso 1 1 calc R . . 
C12 C 0.2043(3) -0.01913(13) 0.5949(3) 0.0419(8) Uani 1 1 d . . . 
H12A H 0.1310 -0.0098 0.5153 0.063 Uiso 1 1 calc R . . 
H12B H 0.1748 -0.0488 0.6383 0.063 Uiso 1 1 calc R . . 
H12C H 0.2815 -0.0329 0.5784 0.063 Uiso 1 1 calc R . . 
C13 C 0.6388(3) 0.13852(13) 0.8246(3) 0.0369(7) Uani 1 1 d . . . 
H13A H 0.5510 0.1354 0.8324 0.044 Uiso 1 1 calc R . . 
H13B H 0.6600 0.1793 0.8204 0.044 Uiso 1 1 calc R . . 
C14 C 0.7472(3) 0.10957(16) 0.9333(3) 0.0444(8) Uani 1 1 d . . . 
H14A H 0.7888 0.1365 1.0037 0.053 Uiso 1 1 calc R . . 
H14B H 0.7107 0.0767 0.9637 0.053 Uiso 1 1 calc R . . 
C15 C 0.8471(3) 0.09028(17) 0.8795(3) 0.0523(9) Uani 1 1 d . . . 
H15A H 0.9244 0.1167 0.9047 0.063 Uiso 1 1 calc R . . 
H15B H 0.8803 0.0516 0.9098 0.063 Uiso 1 1 calc R . . 
C16 C 0.7757(3) 0.09034(17) 0.7423(3) 0.0467(8) Uani 1 1 d . . . 
H16A H 0.8195 0.1170 0.7034 0.056 Uiso 1 1 calc R . . 
H16B H 0.7770 0.0517 0.7083 0.056 Uiso 1 1 calc R . . 
  
loop_ 
 _atom_site_aniso_label 
 _atom_site_aniso_U_11 
 _atom_site_aniso_U_22 
 _atom_site_aniso_U_33 
 _atom_site_aniso_U_23 
 _atom_site_aniso_U_13 
 _atom_site_aniso_U_12 
Ho1 0.01852(6) 0.01865(6) 0.01745(6) 0.00180(4) 0.00867(4) 0.00387(4) 
Si1 0.0250(3) 0.0197(3) 0.0234(4) 0.0028(3) 0.0113(3) -0.0003(3) 
Si2 0.0268(4) 0.0270(4) 0.0235(4) 0.0058(3) 0.0033(3) -0.0028(3) 
Si3 0.0307(4) 0.0223(3) 0.0263(4) -0.0017(3) 0.0145(3) 0.0065(3) 
Si4 0.0222(3) 0.0252(4) 0.0221(3) 0.0007(3) 0.0113(3) -0.0001(3) 
O1 0.0215(9) 0.0348(10) 0.0277(10) -0.0036(8) 0.0093(8) 0.0030(8) 
N1 0.0228(10) 0.0186(10) 0.0187(10) 0.0020(8) 0.0074(8) -0.0006(8) 
N2 0.0216(10) 0.0207(10) 0.0195(10) -0.0014(8) 0.0098(8) 0.0025(8) 
N3 0.0217(10) 0.0232(11) 0.0243(11) 0.0021(9) 0.0097(9) 0.0011(9) 
C1 0.0464(17) 0.0380(16) 0.0370(17) -0.0022(13) 0.0262(14) -0.0060(14) 
C2 0.0352(15) 0.0213(13) 0.0403(16) 0.0070(12) 0.0158(13) -0.0019(11) 
C3 0.0261(13) 0.0308(14) 0.0330(15) -0.0002(12) 0.0084(11) -0.0010(11) 
C4 0.053(3) 0.053(3) 0.158(5) 0.057(3) -0.050(3) -0.012(2) 
C5 0.064(3) 0.150(5) 0.048(2) -0.060(3) 0.032(2) -0.056(3) 
C6 0.0331(15) 0.0455(18) 0.0385(17) -0.0095(14) 0.0136(13) -0.0116(13) 
C7 0.0446(18) 0.0479(19) 0.0377(18) -0.0028(15) 0.0075(14) 0.0267(16) 
C8 0.081(3) 0.0231(15) 0.066(2) 0.0002(15) 0.051(2) -0.0005(16) 
C9 0.0333(15) 0.0349(15) 0.0363(16) -0.0121(13) 0.0163(13) 0.0042(12) 
C10 0.0404(18) 0.057(2) 0.0399(18) 0.0229(16) 0.0066(15) 0.0013(16) 
C11 0.0348(16) 0.0447(18) 0.0500(19) -0.0071(15) 0.0288(15) -0.0083(14) 
C12 0.061(2) 0.0274(15) 0.054(2) -0.0080(14) 0.0396(18) -0.0119(14) 
C13 0.0329(15) 0.0362(16) 0.0393(17) -0.0136(13) 0.0112(13) 0.0022(13) 
C14 0.0373(17) 0.058(2) 0.0311(16) -0.0091(15) 0.0058(13) -0.0007(15) 
C15 0.0373(17) 0.070(2) 0.043(2) 0.0053(18) 0.0081(15) 0.0111(17) 
C16 0.0243(14) 0.070(2) 0.0403(18) -0.0025(17) 0.0069(13) 0.0182(15) 
  
_geom_special_details 
; 
 All esds (except the esd in the dihedral angle between two l.s. planes) 
 are estimated using the full covariance matrix.  The cell esds are taken 
 into account individually in the estimation of esds in distances, angles 
 and torsion angles; correlations between esds in cell parameters are only 
 used when they are defined by crystal symmetry.  An approximate (isotropic) 
 treatment of cell esds is used for estimating esds involving l.s. planes. 
; 
  
loop_ 
 _geom_bond_atom_site_label_1 
 _geom_bond_atom_site_label_2 
 _geom_bond_distance 
 _geom_bond_site_symmetry_2 
 _geom_bond_publ_flag 
Ho1 N1 2.237(2) . ? 
Ho1 N2 2.252(2) . ? 
Ho1 N3 2.296(2) . ? 
Ho1 N3 2.315(2) 3_656 ? 
Ho1 O1 2.3875(18) . ? 
Si1 N1 1.712(2) . ? 
Si1 C1 1.876(3) . ? 
Si1 C2 1.877(3) . ? 
Si1 C3 1.878(3) . ? 
Si2 N1 1.712(2) . ? 
Si2 C6 1.860(3) . ? 
Si2 C5 1.861(4) . ? 
Si2 C4 1.861(4) . ? 
Si3 N2 1.712(2) . ? 
Si3 C8 1.876(3) . ? 
Si3 C7 1.876(3) . ? 
Si3 C9 1.884(3) . ? 
Si4 N2 1.724(2) . ? 
Si4 C10 1.869(3) . ? 
Si4 C12 1.870(3) . ? 
Si4 C11 1.878(3) . ? 
O1 C13 1.452(3) . ? 
O1 C16 1.465(3) . ? 
N3 N3 1.264(4) 3_656 ? 
N3 Ho1 2.315(2) 3_656 ? 
C13 C14 1.510(4) . ? 
C14 C15 1.508(5) . ? 
C15 C16 1.472(5) . ? 
  
loop_ 
 _geom_angle_atom_site_label_1 
 _geom_angle_atom_site_label_2 
 _geom_angle_atom_site_label_3 
 _geom_angle 
 _geom_angle_site_symmetry_1 
 _geom_angle_site_symmetry_3 
 _geom_angle_publ_flag 
N1 Ho1 N2 116.69(7) . . ? 
N1 Ho1 N3 101.20(7) . . ? 
N2 Ho1 N3 106.32(7) . . ? 
N1 Ho1 N3 107.42(7) . 3_656 ? 
N2 Ho1 N3 125.54(7) . 3_656 ? 
N3 Ho1 N3 31.81(9) . 3_656 ? 
N1 Ho1 O1 127.93(7) . . ? 
N2 Ho1 O1 92.65(7) . . ? 
N3 Ho1 O1 110.87(7) . . ? 
N3 Ho1 O1 83.72(7) 3_656 . ? 
N1 Si1 C1 113.95(12) . . ? 
N1 Si1 C2 113.60(12) . . ? 
C1 Si1 C2 107.44(14) . . ? 
N1 Si1 C3 107.75(12) . . ? 
C1 Si1 C3 106.72(14) . . ? 
C2 Si1 C3 106.95(13) . . ? 
N1 Si1 Ho1 35.88(7) . . ? 
C1 Si1 Ho1 127.79(10) . . ? 
C2 Si1 Ho1 123.17(10) . . ? 
C3 Si1 Ho1 71.94(9) . . ? 
N1 Si2 C6 110.89(12) . . ? 
N1 Si2 C5 112.30(16) . . ? 
C6 Si2 C5 105.99(17) . . ? 
N1 Si2 C4 112.76(15) . . ? 
C6 Si2 C4 106.6(2) . . ? 
C5 Si2 C4 107.9(3) . . ? 
N2 Si3 C8 108.60(12) . . ? 
N2 Si3 C7 114.45(13) . . ? 
C8 Si3 C7 105.38(17) . . ? 
N2 Si3 C9 114.40(12) . . ? 
C8 Si3 C9 105.08(15) . . ? 
C7 Si3 C9 108.14(13) . . ? 
N2 Si3 Ho1 37.50(7) . . ? 
C8 Si3 Ho1 71.20(10) . . ? 
C7 Si3 Ho1 123.07(10) . . ? 
C9 Si3 Ho1 128.03(9) . . ? 
N2 Si4 C10 110.13(13) . . ? 
N2 Si4 C12 112.06(12) . . ? 
C10 Si4 C12 107.32(17) . . ? 
N2 Si4 C11 114.30(13) . . ? 
C10 Si4 C11 107.41(16) . . ? 
C12 Si4 C11 105.23(14) . . ? 
C13 O1 C16 106.4(2) . . ? 
C13 O1 Ho1 127.01(15) . . ? 
C16 O1 Ho1 126.59(17) . . ? 
Si2 N1 Si1 123.54(12) . . ? 
Si2 N1 Ho1 118.97(10) . . ? 
Si1 N1 Ho1 117.46(10) . . ? 
Si3 N2 Si4 121.20(12) . . ? 
Si3 N2 Ho1 114.93(10) . . ? 
Si4 N2 Ho1 123.62(10) . . ? 
N3 N3 Ho1 74.92(19) 3_656 . ? 
N3 N3 Ho1 73.27(18) 3_656 3_656 ? 
Ho1 N3 Ho1 148.19(9) . 3_656 ? 
O1 C13 C14 104.6(2) . . ? 
C15 C14 C13 104.0(3) . . ? 
C16 C15 C14 106.3(3) . . ? 
O1 C16 C15 107.8(3) . . ? 
  
_diffrn_measured_fraction_theta_max    0.970 
_diffrn_reflns_theta_full              28.29 
_diffrn_measured_fraction_theta_full   0.970 
_refine_diff_density_max    0.628 
_refine_diff_density_min   -0.645 
_refine_diff_density_rms    0.086 
  
#===end


  
  
